# Supplementary material for: A cyanine-derived “turn-on” fluorescent probe for imaging nitroreductase in hypoxic tumor cells
Source: Royal Society of Chemistry journal article supplement (doi:10.1039/c5ay02312b), 2015-01-01
Supplement: c5ay02312b1.pdf [file c5ay02312b1.pdf]

Electronic Supplementary Information (ESI):

## **A Cyanine-Derived “Turn-On” Fluorescent Probe for Imaging Nitroreductase in Hypoxic Tumor Cells**

Cong Xue<sup>a</sup>, Yingjie Lei<sup>a,b</sup>, Sichun Zhang<sup>a\*</sup> and Yaowu Sha<sup>a\*</sup>

a. Department of Chemistry, Beijing Key Laboratory of Microanalytical Methods and Instrumentation, Tsinghua University, Beijing, 100084, China

b. Department of Chemistry and chemical engineering, Tianjin University of Technology, Tianjin, 300384, China

\*Corresponding Author: [sczhang@mail.tsinghua.edu.cn](mailto:sczhang@mail.tsinghua.edu.cn); [shyw@mail.tsinghua.edu.cn](mailto:shyw@mail.tsinghua.edu.cn)

### **Experimental section**

#### **I. Chemicals and apparatus**

Unless otherwise stated, all chemicals for synthesis were purchased from commercial suppliers and were used without further purification. Nitroreductase (NTR) expressed in *Escherichia coli* was purchased from Sigma-Aldrich, NADH was obtained from J&K scientific Reagent Ltd (Beijing, China). Cell culture products were purchased from Corning Co., Ltd (NY, USA). All phosphate-buffered solutions (PB) were obtained from Beijing Dingguo Changsheng biotechnology Co., Ltd (Beijing, China). Deionized water from a Millipore water system was used throughout.

Fluorescence spectra measurements were performed on a Thermo Scientific

Varioskan Flash multimode reader (Waltham, MA, USA) and a HITACHI F-7000 spectrofluorimeter (Tokyo, Japan). Confocal fluorescence images were recorded with a FV-1000 confocal laser scanning microscopy (Olympus Co., Ltd, Germany). Nuclear magnetic resonance (NMR) spectra were measured on a JEOL JNM-ECA 300 spectrometer (Tokyo, Japan) using tetramethylsilane (TMS) in the solvent of CDCl<sub>3</sub> or MeOD as an internal standard. ESI Mass spectra measurements were performed on a Thermo Fisher LTQ linear ion-trap mass spectrometer (San Jose, CA, USA).

## II. Synthesis of the fluorescent probe 1

The desired compound was readily synthesized in reasonable yield from the isophthalaldehyde and the indolinium by a condensation reaction.

4-(4-nitrobenzyloxy) isophthalaldehyde was prepared from 4-hydroxy-benzene- 1,3-dicarbaldehyde with p-Nitobenzylbromide in DMF described as our previous work.

While 2,3,3-trimethyl-1-(3-sulfopropyl)-3H-benzo[f]indolinium was prepared from 2,3,3-trimethyl-3H-benzo[f]indolenine (0.21 g, 1 mmol) and 1,3-propane sultone (0.15 g, 1.2 mmol) in toluene (5 mL) at 90°C for 4h under N<sub>2</sub>, which was cooled to room temperature, filtered and purified by column chromatography with petroleum ether/ethyl acetate (v/v, 2:1) on silica gel as a pale grey solid (0.29 g, 88% yield, R<sub>f</sub> = 0.45).

A mixture of 4-(4-nitrobenzyloxy) isophthalaldehyde (0.14 g, 0.5 mmol), NaOAc

(0.091 g, 1.1 mmol), and the indolinium (0.37 g, 1.1 mmol) in Ac<sub>2</sub>O (8 mL) and stirred at 80°C for 30 min. After completion, the reaction mixture was cooled to room temperature and concentrated under vacuum. The residue was purified by column chromatography with dichloromethane/methanol (v/v, 5:1) on silica gel to afford the probe **1** as an orange solid (0.37 g, 40%, R<sub>f</sub>=0.55, melting point >300°C). <sup>1</sup>H NMR ((400MHz, DMSO-*d*<sub>6</sub>): δ = 9.38 (s, 1H), 8.75-8.66 (m, 3H), 8.44 (d, 1H, *J*=8.9 Hz), 8.38-8.34 (m, 4H), 8.31-8.22 (m, 8H), 8.13-8.10 (m, 1H), 7.90-7.81 (m, 5H), 7.75-7.72 (m, 3H), 7.57-7.55 (m, 1H), 5.72 (s, 2H), 5.14-5.02 (m, 4H), 2.12-2.07 (m, 8H), 2.04-1.90 (m, 8H). <sup>13</sup>C NMR (100MHz, CDCl<sub>3</sub> + drop of MeOD): δ = 142.8, 132.3, 131.8, 128.2, 124.2, 114.2, 112.0, 111.9, 77.4, 77.2, 76.9, 70.2, 49.4, 49.2, 49.1, 49.0, 48.8, 29.6, 27.0, 26.6, 25.0, 24.9. MS (ESI): *m/z* calc. for C<sub>51</sub>H<sub>49</sub>N<sub>3</sub>O<sub>9</sub>S<sub>2</sub>: 911.29, found: 934.18, [M+Na]<sup>+</sup>

### III. Kinetic Parameters Measurements

All kinetic parameters determinations were measured in phosphate buffer (50 mM, pH 7.4) at 37°C containing NTR (10 μg/mL) and NADH (0.5 mM) as an electron donor. The kinetic rate was measured by adding varied concentrations of Probe **1** (0-50 μM) into the reaction solutions. The parameters of the kinetic enzymatic reaction, Michaelis-Menten constant (*K<sub>m</sub>*), maximum rate (*V<sub>max</sub>*) and catalytic rate constant (*k<sub>cat</sub>*) were investigated from Lineweaver-Burk plot. The excitation and emission wavelengths were 605 nm and 720 nm.

### IV. Selectivity Measurements of Probe **1**

Stock solutions (20 mM) of biological reductants in phosphate buffer (50 mM, pH 7.4) were prepared. The determinations were carried out by adding 50  $\mu$ L stock solutions of biological reductants into the test solutions (final volume 1 mL) in the presence of Probe **1** (10  $\mu$ M) with or without NTR (10  $\mu$ g/mL). The test solution was kept for 20 min at 37°C, then measured with excitation at 605 nm and recorded the fluorescence intensity at 720 nm.

## **V. Confocal Fluorescence Imaging of HeLa Cells**

HeLa cells were obtained from Cell Resource Center, IBMS, CAMS/PUMC and cultured in Dulbecco's modified eagle medium (DMEM) supplemented with 10% fetal bovine serum (FBS) and 100 IU/ mL penicillin-streptomycin. Cells were incubated at 37°C in a humidified atmosphere under normoxic (5% CO<sub>2</sub>, 95% air) and hypoxic (5% CO<sub>2</sub>, 94% N<sub>2</sub> and 1% O<sub>2</sub>) conditions. Cells were passed by 0.25% trypsin (2.21 mM EDTA and 0.25% trypsin) in sodium bicarbonate buffer solution before use. For cell imaging experiments, HeLa cells were incubated with 10  $\mu$ M probe **1** for 1 hour in FBS-free DMEM at 37°C. Before imaging, Cells were washed three times with prewarmed DMEM to remove the residue probe and then rinsed with DMEM.

## **VI. NMR and ESI mass spectra of probe 1**

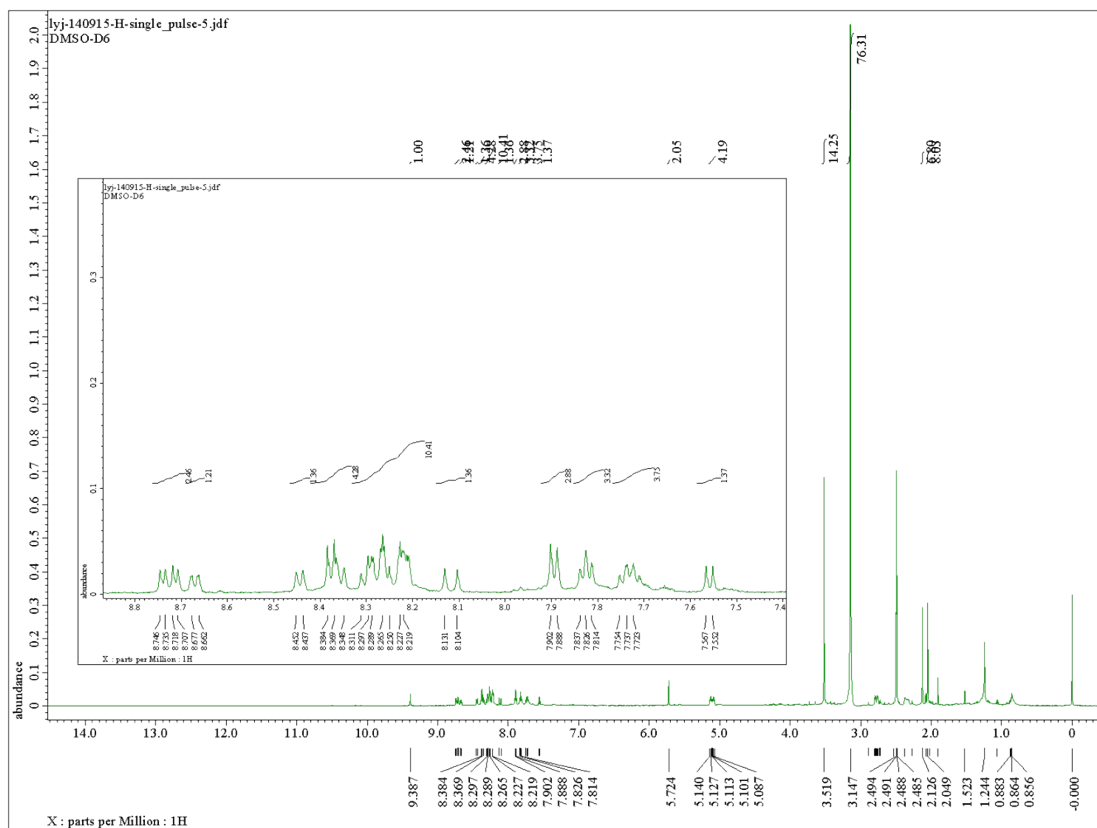

$^1\text{H}$  NMR spectrum of probe 1

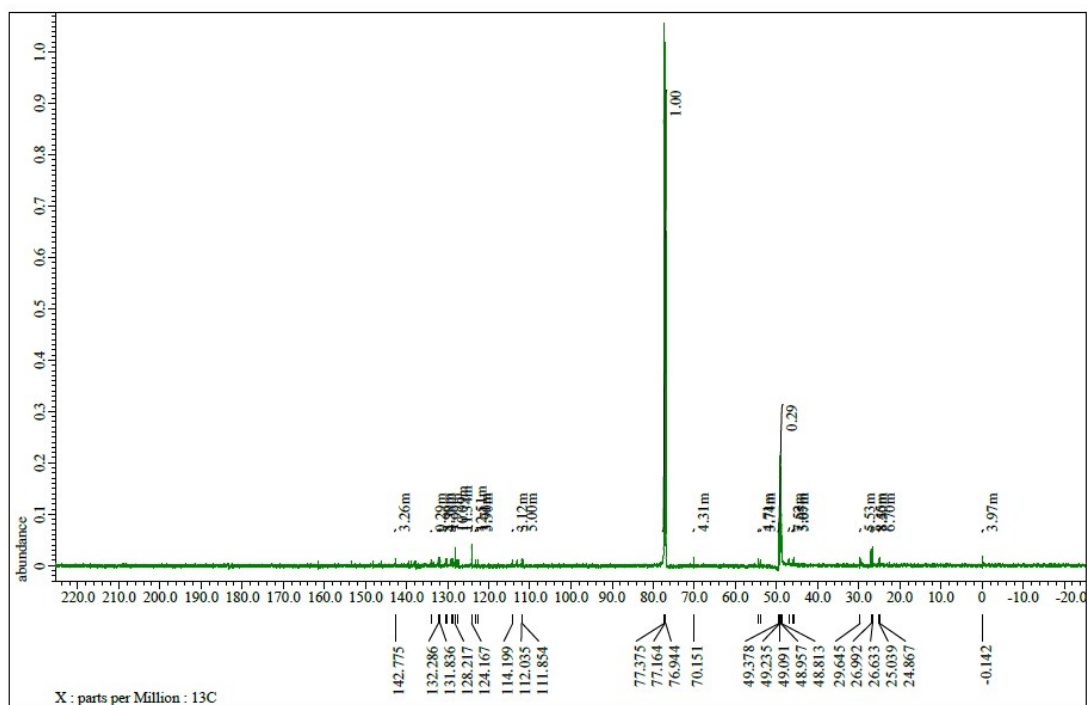

$^{13}\text{C}$  NMR spectrum of probe 1

201471-A MeOH+H2O\_140708211645 #45-103 RT: 0.24-0.55 AV: 59 NL: 1.14E4  
T: ITMS + p ESI Full ms [600.00-2000.00]

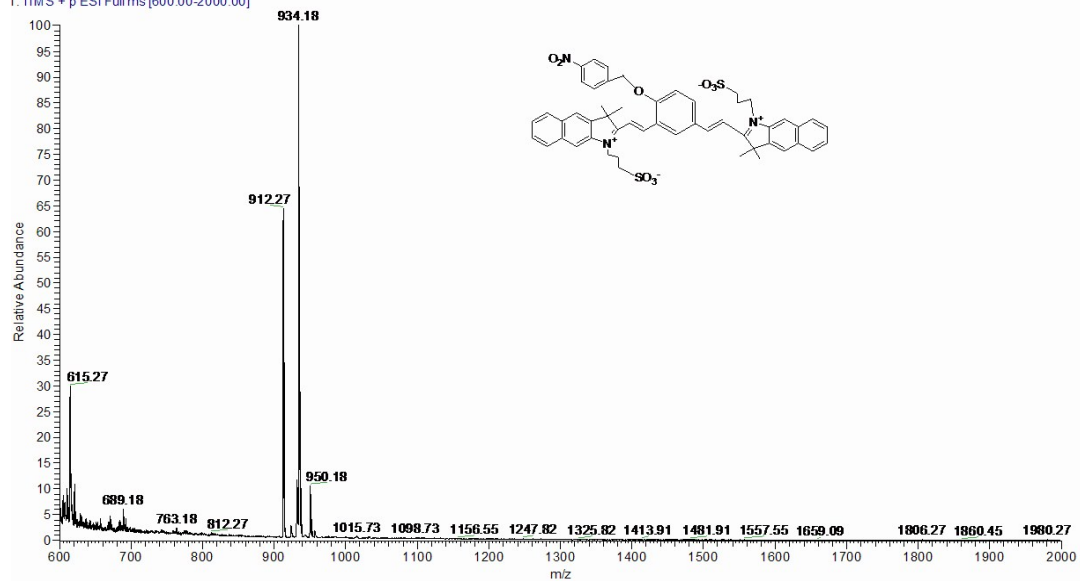

ESI mass spectrum of probe 1
